# Supplementary material for: Constructing high-performance low-temperature curable PI materials by manipulating the side group effects of diamine
Source: Royal Society of Chemistry journal article supplement (doi:10.1039/d3tc00198a), 2023-01-01
Supplement: d3tc00198a1.pdf [file d3tc00198a1.pdf]

## Supplementary Material

### **Constructing High Performance Low-temperature Curable PI Materials by Manipulating the Side Group Effects of Diamine**

Shan Huang<sup>§</sup>[a, b], Xialei Lv<sup>§</sup>[a], Yao Zhang[a], Jinhui Li<sup>\*</sup>[a], Shilu Zhou[a], Siyao Qiu[a], Zimeng He[a], Tao Wang[a], Guoping Zhang<sup>\*</sup>[a], and Rong Sun[a]

[a] Shenzhen International Innovation Institutes of Advanced Electronic Materials, Shenzhen Institutes of Advanced Technology, Chinese Academy of Sciences, Shenzhen 518055, China.

[b] Department of Nano Science and Technology Institute, University of Science and Technology of China, Suzhou, 215123, China

<sup>§</sup>These authors contribute equally to this work.

E-mail: [jh.li@siat.ac.cn](mailto:jh.li@siat.ac.cn) and [gp.zhang@siat.ac.cn](mailto:gp.zhang@siat.ac.cn)

## **Table of Contents**

- I. Experimental section.**
- II. Synthesis of monomers.**
- III. Additional FTIR spectra and XRD patterns of PI films.**
- IV. Additional TMA curves and linearly polarized IR spectroscopy of PI films.**
- V. Additional TGA curves and stress-strain curves of PI films.**
- VI. Additional detailed data of PI films.**

## I. Experimental Section.

### *Materials*

The solvents required for synthesis including *N,N*-Dimethylformamide (DMF) (99.8%), *N,N*-dimethylacetamide (DMAc) (99.8%), dimethyl sulfoxide (99.8%) (DMSO) methylbenzene (PhMe), ethanol (EtOH), and 1,4-dioxane were all commercially available, and used without other pretreatment.. The other raw materials for synthesis including 4-bromoresorcinol, phenylboronic acid, 5-pyrimidinylboronic acid, 85% hydrazine hydrate, 10% Pd/C, potassium carbonate, Pd132 and 4-chloronitrobenzene were commercially purchased and used without any further purification. Pyromellitic Dianhydride (PMDA) (99.0%) and 4,4'-oxydianiline (ODA) (99.9%) were obtained from Tokyo Chemical Industry (TCI) Co., Ltd. Additionally, ODA and PMDA were dried at 60°C and 120°C respectively in a vacuum oven for 10 h prior to use.

### *Instruments*

The NMR spectra were tested by a Bruker AVANCE III 400 MHz spectrometer (<sup>1</sup>H NMR: 400 MHz, <sup>13</sup>C NMR: 100 MHz) to verify the structure of the intermediates as well as the end products. The high-performance liquid chromatography (HPLC) was obtained by Ultimate 3000 to estimate the purity of diamine monomer PhNH<sub>2</sub> and SPMNH<sub>2</sub>. The molecular weight of PAAs was measured by gel permeation chromatography (Waters Alliance e2695) at a flow rate of 1.0 mL/min at room temperature and DMF was used as eluent. The Fourier transform-infrared (FT-IR) spectra and polarized attenuated total reflection/Fourier transform infrared spectroscopy were recorded with Vertex 70 (Bruker, Germany) from 4000 cm<sup>-1</sup> to 600 cm<sup>-1</sup>. Wide-angle X-ray data were collected on a Bruker D8 Advance diffractometer (Bruker, Germany) with CuK $\alpha$  radiation at a wavelength of 0.15418 nm with step scanning by  $2\theta$  intervals from 5° to 50°. The  $d$ -spacing was calculated according to Bragg's equation:  $\lambda = 2d \cdot \sin\theta$ . The thermal properties such as  $T_d$  (thermal decomposition temperature) were tested using a STD Q600 (TA Instruments, America). Coefficient of thermal expansion (CTE) of the PI films and  $T_g$  (glass transition temperature) were measured with thermal mechanical analysis (TMA) with

a heating rate of 10°C/min from 30-400°C by NETZSCHTMA 402. The mechanical properties of the samples were also measured using DMA Q800 with a constant stretching speed of 2 N min<sup>-1</sup> at room temperature. The high frequency dielectric constant (10 GHz) of PI films was measured by e5071c keysight ENA vector network analyzer, and the samples were pretreated in oven at 150°C for 2 h. Incidentally, most of the general methods are the same as our published paper before.

### ***Calculations***

The ground state (S<sub>0</sub>) geometries of the three diamines were optimized by density functional theory (DFT) with B3LYP functional 6-31G basis set via Gaussian 16. The pKa values were calculated by B3LYP functional with Def2TZVP basis set. Besides, polarizable continuum model (PCM) with DMAc solvent has been included in pKa calculations. To obtain accurate proton energy under DMAc solvent, proton binding with 7 DMAc molecules have been calculated.

## **II. Synthesis of monomers.**

### *Synthesis of 4,4'-([1,1'-biphenyl]-2,4-diylbis(oxy))dianiline (PhNH<sub>2</sub>)*

*Synthesis of BrNO<sub>2</sub>.* As shown in **Scheme S1**, 4-bromoresorcinol (20.00 g, 105.81 mmol), 4-chloronitrobenzene (41.68 g, 264.54 mmol), potassium carbonate (36.56 g, 264.54 mmol), and DMSO (80 mL) were added into a 250 mL three-necked round bottom flask under nitrogen and reacted for 12 h after heating to 150°C. When the reaction was complete, the reaction solution was extracted with deionized water and dichloromethane. The crude product was collected and purified by chromatography on silica gel with petroleum ether (PE)/dichloromethane (DCM) as an eluent. The purified product was yellow powder with a yield of 90%. <sup>1</sup>H NMR (400 MHz, chloroform-*d*) δ 8.30 - 8.23 (m, 4H), 7.74 (d, *J* = 8.7 Hz, 1H), 7.14 - 7.07 (m, 2H), 7.07 - 6.99 (m, 2H), 6.95 (dd, *J* = 8.7, 2.7 Hz, 1H), 6.91 (d, *J* = 2.7 Hz, 1H). HRMS (APCI) *m/z*: [M + H]<sup>+</sup> calcd for C<sub>18</sub>H<sub>12</sub>O<sub>6</sub>N<sub>2</sub>Br, 430.9811; found, 430.9819.

*Synthesis of PhNO<sub>2</sub>*. The BrNO<sub>2</sub> (10.00 g, 23.19 mmol), phenylboronic acid (2.96 g, 24.35 mmol), potassium carbonate (6.41 g, 46.38 mmol), Pd132 were added into a 500 mL three-necked round bottom flask under nitrogen, and PhMe, EtOH and H<sub>2</sub>O were used as reaction solvents, followed by a reaction at 90°C for 14 h. The crude product was extracted and then purified by chromatography on silica gel with petroleum ether (PE)/dichloromethane (DCM) as an eluent. The yield of the purified product was 80%. <sup>1</sup>H NMR (400 MHz, DMSO-*d*<sub>6</sub>) δ 8.30 - 8.25 (m, 2H), 8.18 - 8.12 (m, 2H), 7.68 (d, *J* = 8.5 Hz, 1H), 7.51 - 7.45 (m, 2H), 7.41 - 7.34 (m, 2H), 7.33 - 7.27 (m, 3H), 7.25 (dd, *J* = 8.5, 2.5 Hz, 1H), 7.16 (d, *J* = 2.4 Hz, 1H), 7.12 - 7.07 (m, 2H). HRMS (APCI) *m/z*: [M + H]<sup>+</sup> calcd for C<sub>24</sub>H<sub>17</sub>O<sub>6</sub>N<sub>2</sub>, 429.1030; found, 429.1035.

*Synthesis of PhNH<sub>2</sub>*. Firstly, the PhNO<sub>2</sub> (10.00 g, 23.34 mmol), 10% Pd/C (2.00 g), and 1,4-dioxane (40 mL) were added into a 500 mL three-necked round bottom flask under nitrogen. Then, 6 mL 85% hydrazine hydrate was added slowly dropwise to the reaction solution through a syringe after heating to 100°C with stirring. The reaction was terminated after 20 h under nitrogen atmosphere. Finally, Pd/C was filtered to remove and the crude product was purified by chromatography on silica gel with petroleum ether (PE)/ethyl acetate (EA) as an eluent. The purified product was white powder with a yield of 85%. <sup>1</sup>H NMR (400 MHz, DMSO-*d*<sub>6</sub>) δ 7.55 - 7.49 (m, 2H), 7.39 (dd, *J* = 8.4, 6.9 Hz, 2H), 7.34 - 7.26 (m, 2H), 6.80 - 6.70 (m, 4H), 6.54 (ddd, *J* = 14.1, 8.6, 2.8 Hz, 5H), 6.29 (d, *J* = 2.5 Hz, 1H), 5.01 (s, 4H). <sup>13</sup>C NMR (100 MHz, DMSO-*d*<sub>6</sub>) δ 160.74, 159.75, 156.86, 146.14, 146.09, 145.74, 145.43, 137.89, 132.04, 129.47, 128.56, 127.16, 125.18, 121.50, 121.38, 120.86, 115.34, 115.25, 110.41, 105.62. HRMS (APCI) *m/z*: [M + H]<sup>+</sup> calcd for C<sub>24</sub>H<sub>21</sub>O<sub>2</sub>N<sub>2</sub>, 396.1577; found, 396.1595.

*Synthesis of 4,4'-((4-(pyrimidin-5-yl)-1,3-phenylene)bis(oxy))dianiline (SPMNH<sub>2</sub>)*

*Synthesis of SPMNO<sub>2</sub>*. The BrNO<sub>2</sub> (10.00 g, 23.19 mmol), 5-pyrimidinylboronic acid

(3.02 g, 24.35 mmol), potassium carbonate (6.41 g, 46.38 mmol), Pd132, PhMe, EtOH and H<sub>2</sub>O were added into a 500 mL three-necked round bottom flask to react for 16 h at 90°C, and a nitrogen atmosphere was maintained in the flask. The crude product was treated in the same way as synthesis of PhNO<sub>2</sub>. The purified product was yellow powder with a yield of 80%. <sup>1</sup>H NMR (400 MHz, DMSO-*d*<sub>6</sub>) δ 9.14 (s, 1H), 8.98 (s, 2H), 8.33 - 8.27 (m, 2H), 8.22 - 8.15 (m, 2H), 7.87 (d, *J* = 8.5 Hz, 1H), 7.31 (td, *J* = 8.3, 7.2, 2.4 Hz, 3H), 7.25 (d, *J* = 2.4 Hz, 1H), 7.22 - 7.15 (m, 2H). HRMS (APCI) *m/z*: [M + H]<sup>+</sup> calcd for C<sub>22</sub>H<sub>15</sub>O<sub>6</sub>N<sub>4</sub>, 431.0911; found, 431.0916.

*Synthesis of SPMNH<sub>2</sub>*. The SPMNO<sub>2</sub> (10.00 g, 23.24 mmol) and 10% Pd/C (2.00 g) were added into a 500 mL 3-neck round bottom flask under nitrogen, and 1,4-dioxane (40 mL) was used as the reaction solvent. After heating to reflux with stirring, 6 mL 85% hydrazine hydrate was added dropwise slowly by a syringe. And the reaction time was roughly 20 h. The crude product was treated in the same way as synthesis of PhNH<sub>2</sub>. The purified product was yellow powder with a yield of 78%. <sup>1</sup>H NMR (400 MHz, DMSO-*d*<sub>6</sub>) δ 9.12 (s, 1H), 8.99 (s, 2H), 7.48 (d, *J* = 8.5 Hz, 1H), 6.83 - 6.72 (m, 4H), 6.62 - 6.51 (m, 5H), 6.32 (d, *J* = 2.4 Hz, 1H), 5.03 (s, 4H). <sup>13</sup>C NMR (100 MHz, DMSO-*d*<sub>6</sub>) δ 161.17, 157.46, 156.99, 156.80, 146.33, 146.22, 145.33, 145.02, 132.11, 131.55, 121.49, 121.15, 117.90, 115.29, 115.24, 110.49, 105.04. HRMS (APCI) *m/z*: [M + H]<sup>+</sup> calcd for C<sub>22</sub>H<sub>19</sub>O<sub>2</sub>N<sub>4</sub>, 371.1483; found, 371.1495.

*Synthesis of 4,4'-([1,1'-biphenyl]-2,4-diylbis(oxy))dianiline (PMNH<sub>2</sub>)*

The diamine monomer was synthesized as reported in our previous research.<sup>1</sup>

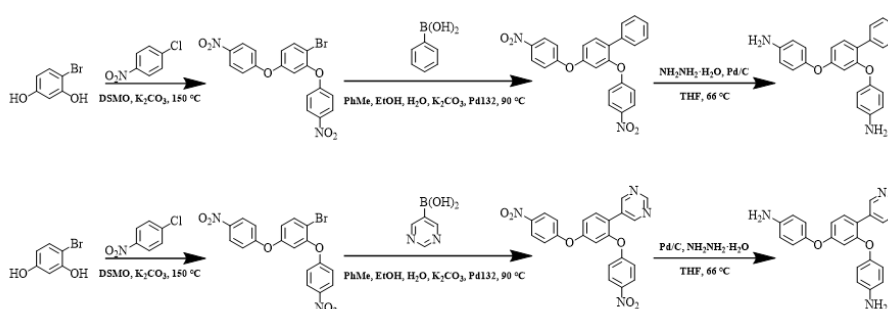

**Scheme S1** Synthesis of PhNH<sub>2</sub> and SPMNH<sub>2</sub>.

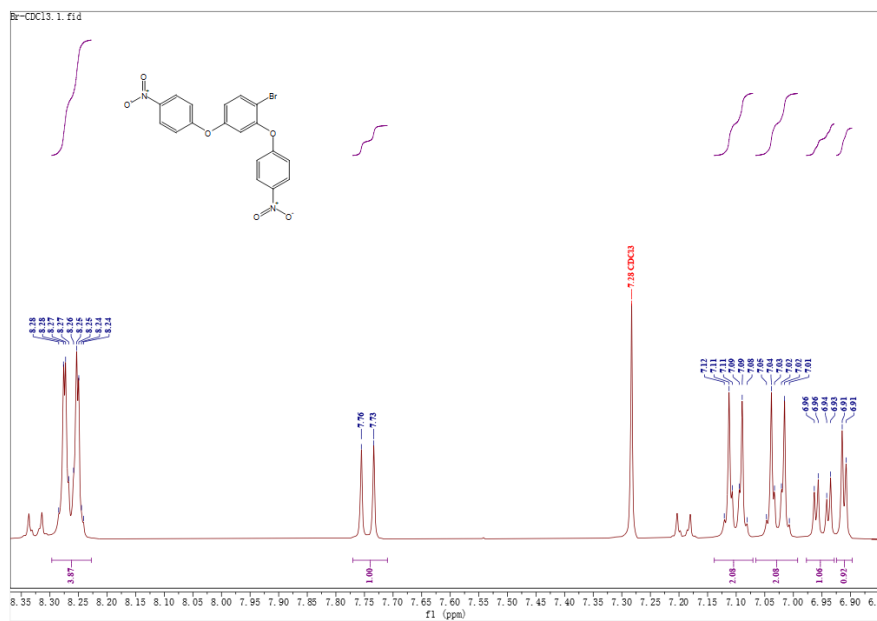

**Fig. S1** <sup>1</sup>H NMR spectrum of BrNO<sub>2</sub> in chloroform-*d*.

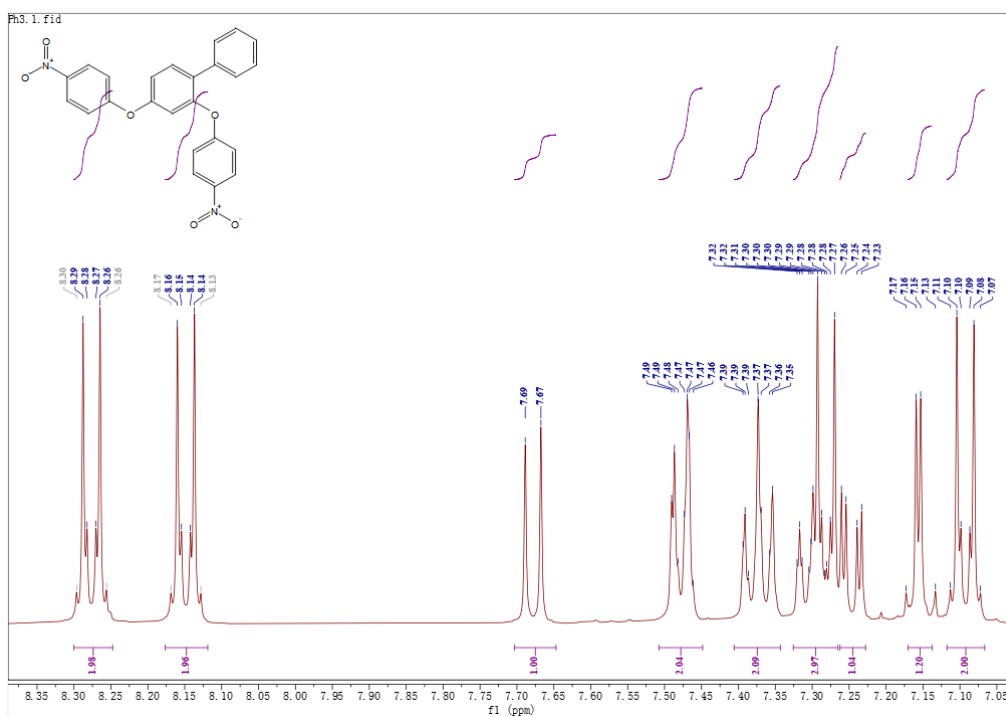

**Fig. S2** <sup>1</sup>H NMR spectrum of PhNO<sub>2</sub> in DMSO-*d*<sub>6</sub>.

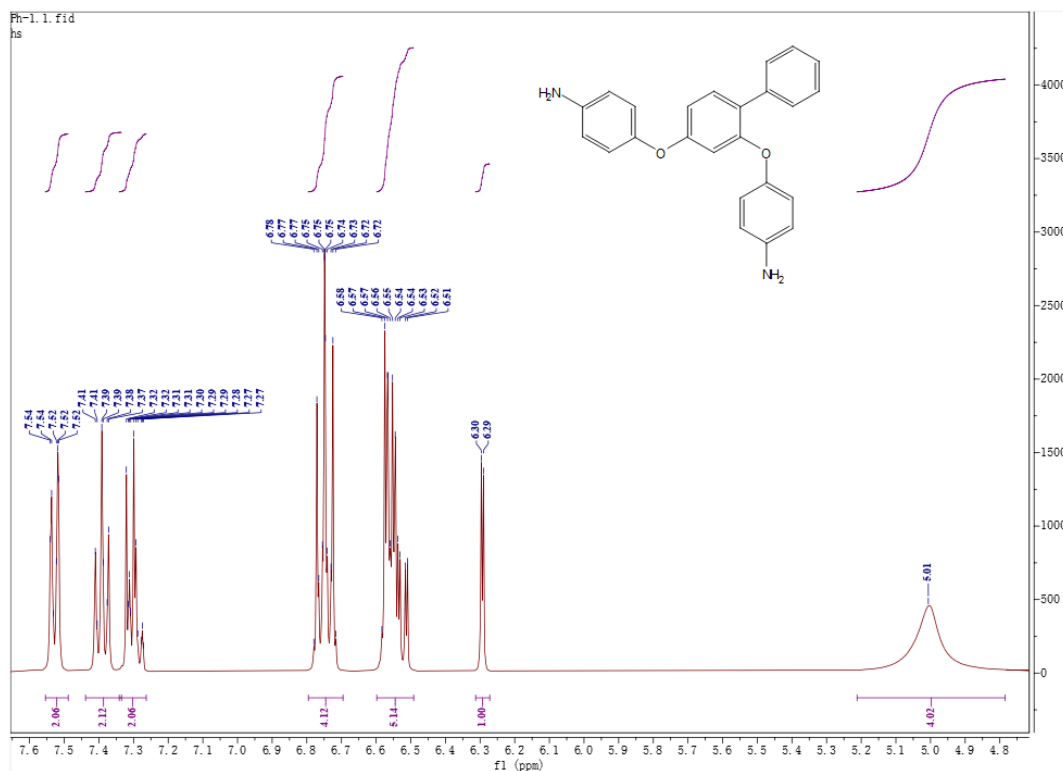

Fig. S3 <sup>1</sup>H NMR spectrum of PhNH<sub>2</sub> in DMSO-*d*<sub>6</sub>.

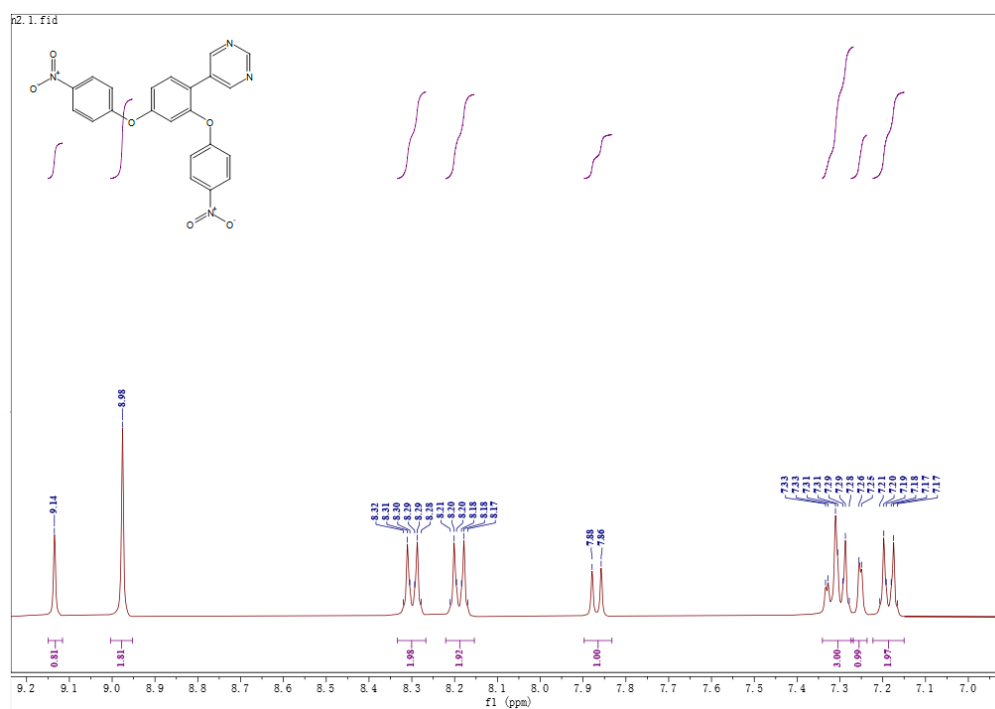

Fig. S4 <sup>1</sup>H NMR spectrum of SPMNO<sub>2</sub> in DMSO-*d*<sub>6</sub>.



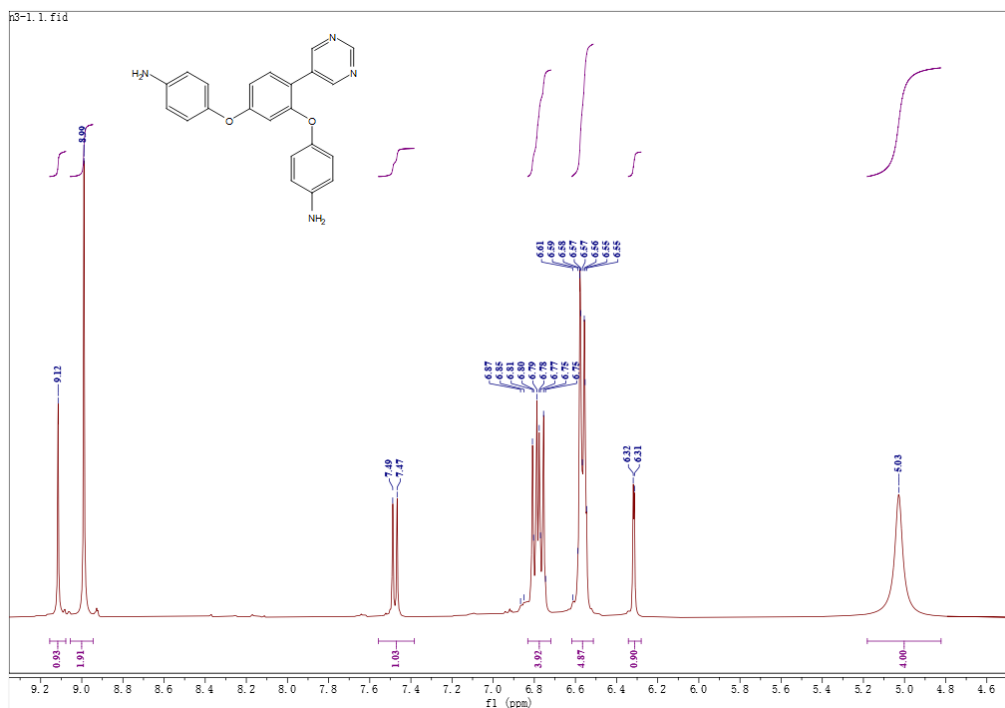

Fig. S5 <sup>1</sup>H NMR spectrum of SPMNH<sub>2</sub> in DMSO-*d*<sub>6</sub>.

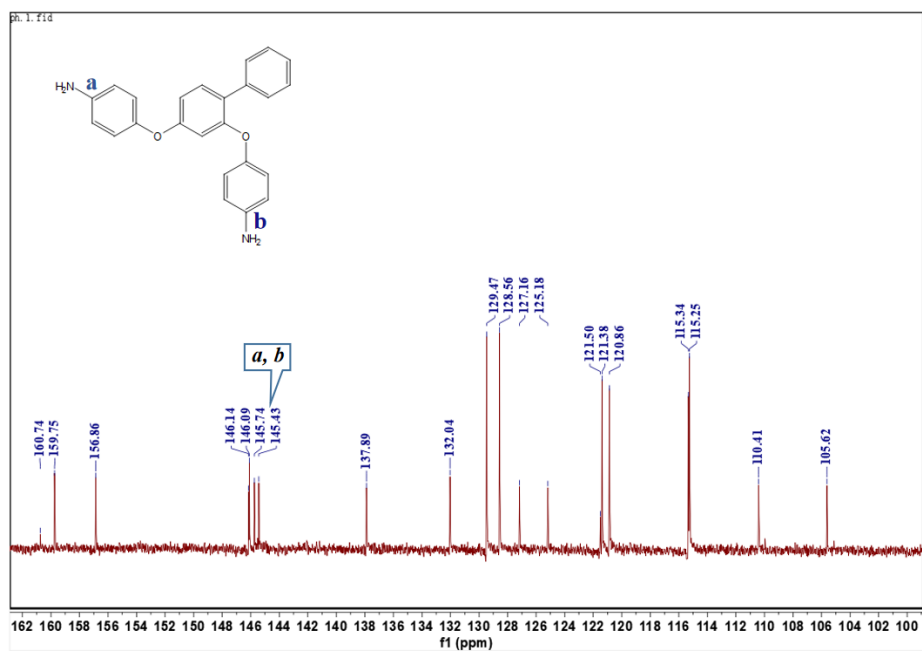

Fig. S6 <sup>13</sup>C NMR spectrum of PhNH<sub>2</sub> in DMSO-*d*<sub>6</sub>.

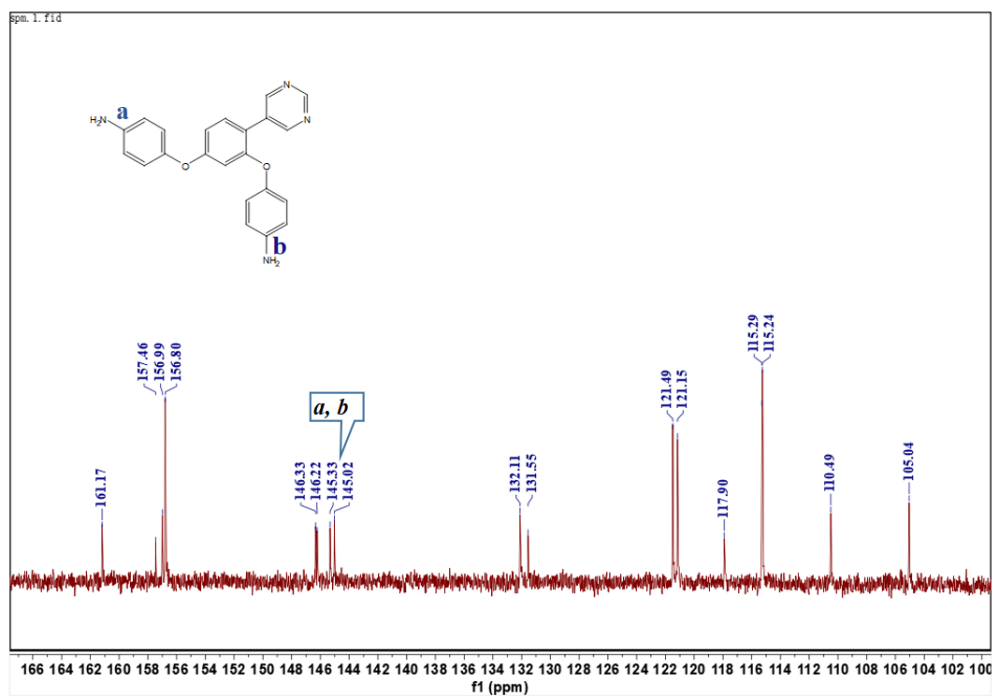

Fig. S7 <sup>13</sup>C NMR spectrum of SPMNH<sub>2</sub> in DMSO-*d*<sub>6</sub>.

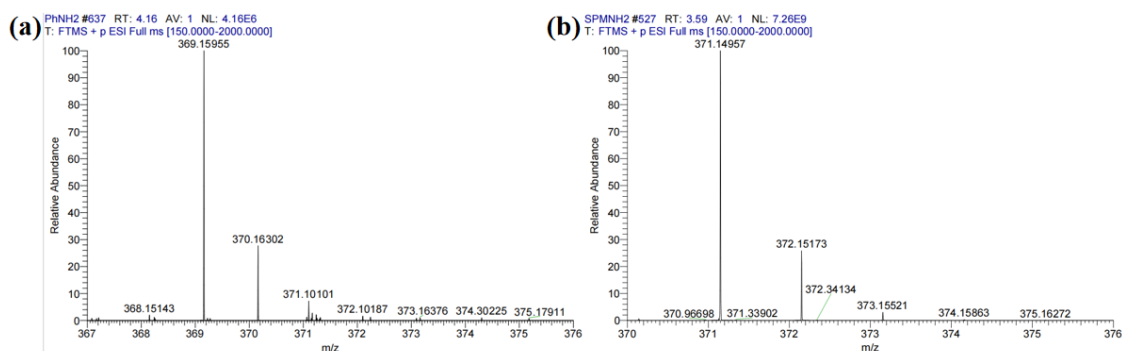

Fig. S8 HRMS spectrum of (a) PhNH<sub>2</sub> and (b) SPMNH<sub>2</sub>.

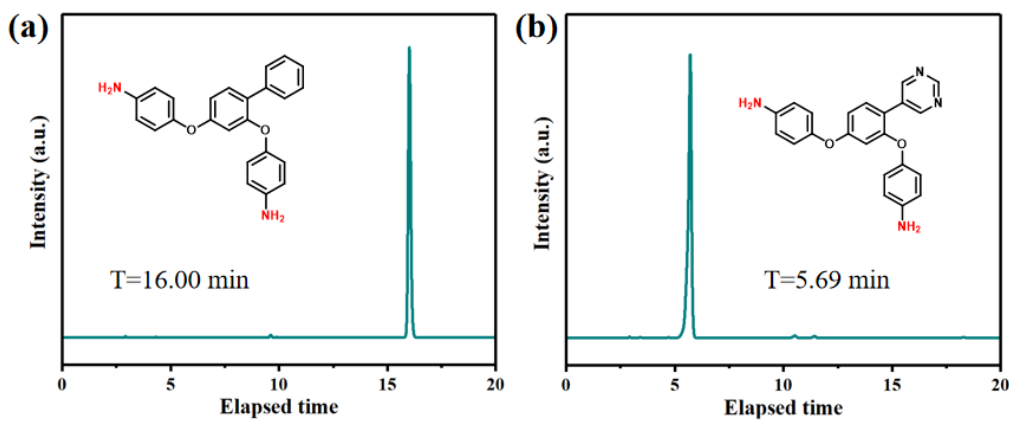

Fig. S9 HPLC spectrum of (a) PhNH<sub>2</sub> and (b) SPMNH<sub>2</sub>.

### III. Additional FTIR spectra and XRD patterns of PI films.

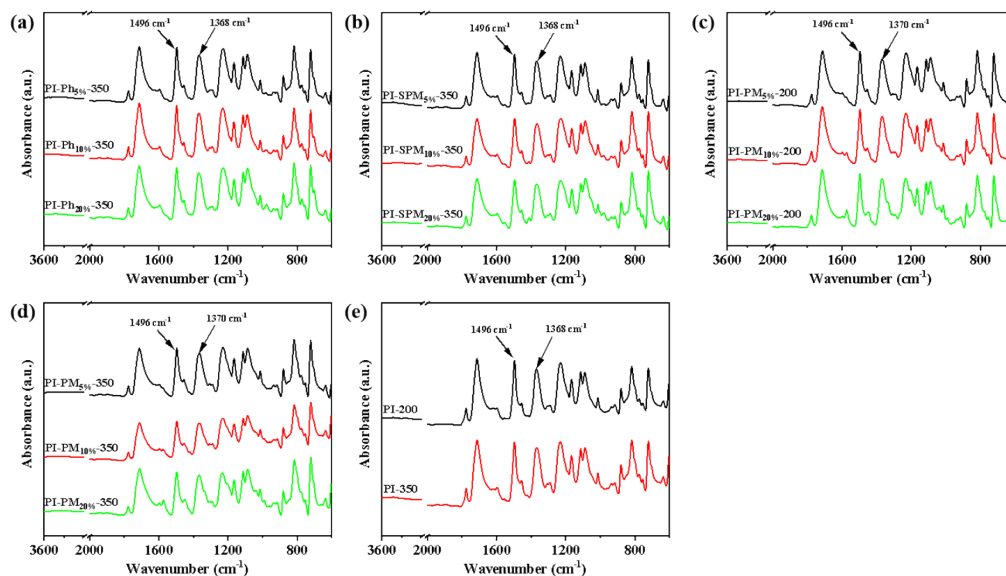

**Fig. S10** FTIR spectra of (a) (PhNH<sub>2</sub>/ODA)/PMDA co-PI films cured at 350°C, (b) (SPMNH<sub>2</sub>/ODA)/PMDA co-PI films cured at 350°C, (c) (PMNH<sub>2</sub>/ODA)/PMDA co-PI films cured at 200°C, (d) (PMNH<sub>2</sub>/ODA)/PMDA co-PI films cured at 350°C and (e) ODA/PMDA PI films.

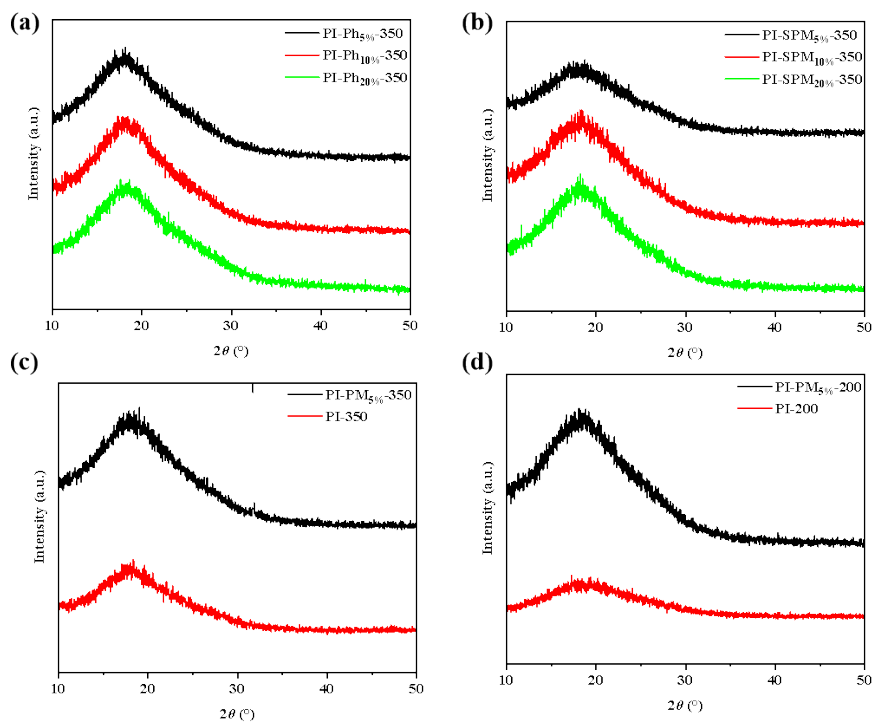

**Fig. S11** XRD patterns of (a) (PhNH<sub>2</sub>/ODA)/PMDA co-PI films cured at 350°C, (b) (SPMNH<sub>2</sub>/ODA)/PMDA co-PI films cured at 350°C, (c) PI-PM<sub>5%</sub>-350 and PI-350, (d) PI-PM<sub>5%</sub>-200 and PI-200.

#### IV. Additional TMA curves and linearly polarized IR spectroscopy of PI films.

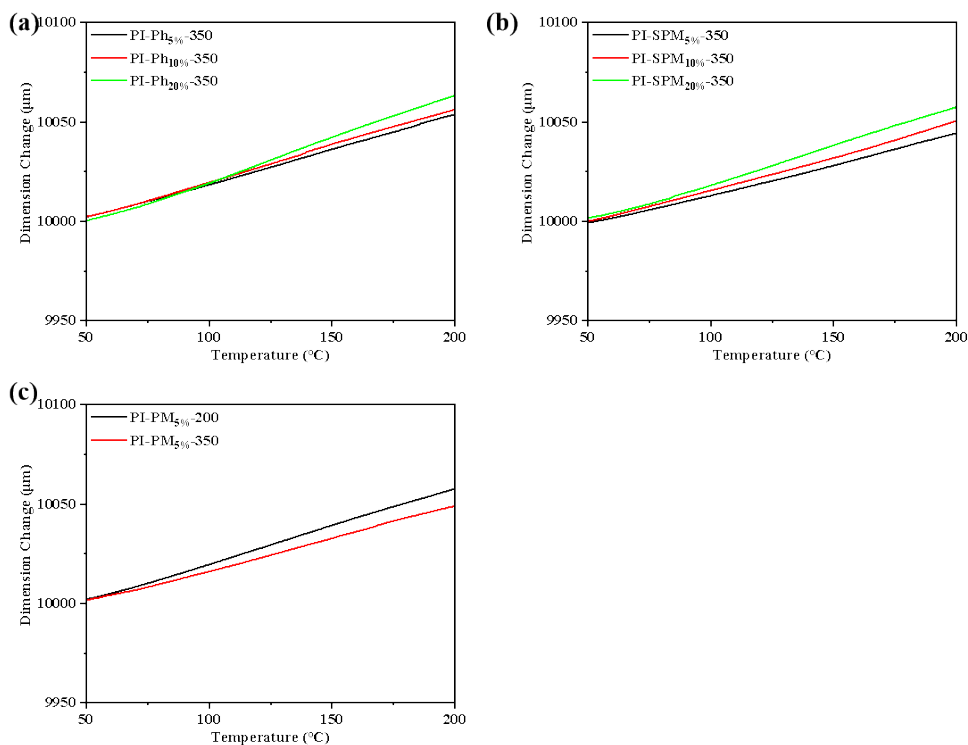

**Fig. S12** TMA curves of (a) (PhNH<sub>2</sub>/ODA)/PMDA co-PI films cured at 350°C, (b) (SPMNH<sub>2</sub>/ODA)/PMDA co-PI films cured at 350°C and (c) PI-PM<sub>5%</sub>-200 and PI-PM<sub>5%</sub>-350.

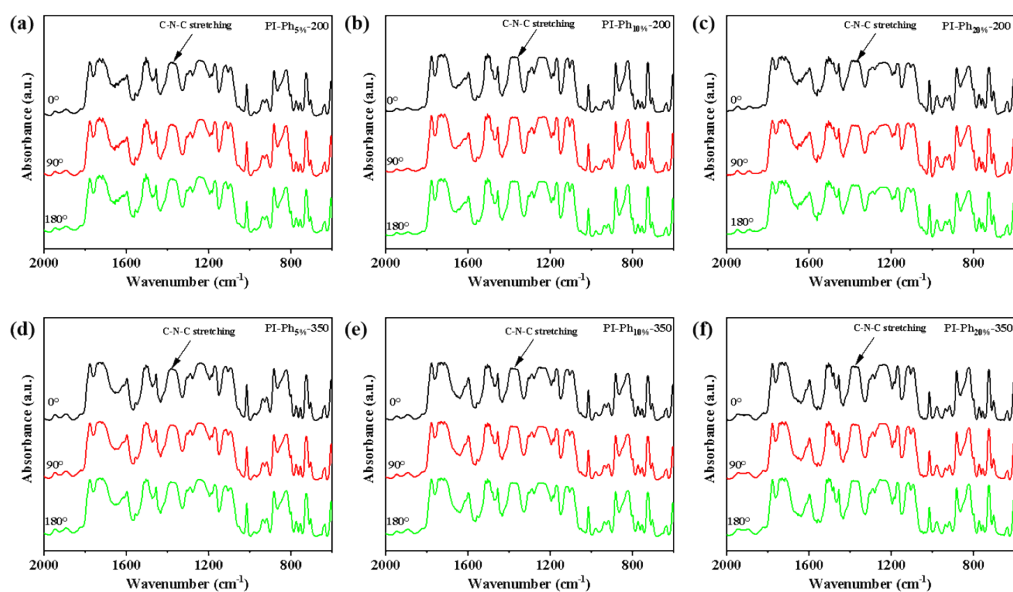

**Fig. S13** Linearly polarized IR spectroscopy of (a) PI-Ph<sub>5%</sub>-200, (b) PI-Ph<sub>10%</sub>-200, (c) PI-Ph<sub>20%</sub>-

200, (d) PI-Ph<sub>5%</sub>-350, (e) PI-Ph<sub>10%</sub>-350, (f) PI-Ph<sub>20%</sub>-350.

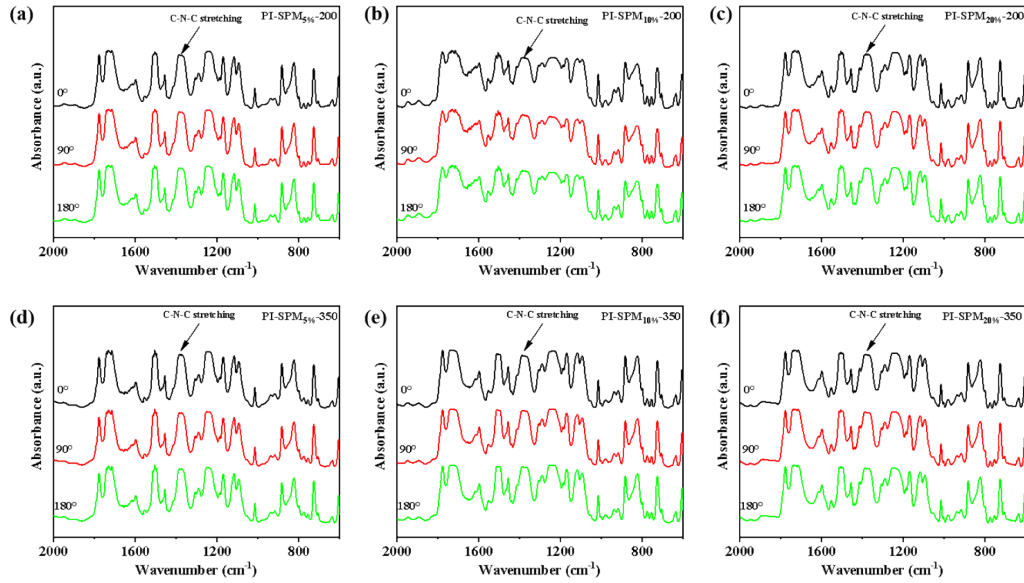

**Fig. S14** Linearly polarized IR spectroscopy of (a) PI-SPM<sub>5%</sub>-200, (b) PI-SPM<sub>10%</sub>-200, (c) PI-SPM<sub>20%</sub>-200, (d) PI-SPM<sub>5%</sub>-350, (e) PI-SPM<sub>10%</sub>-350, (f) PI-SPM<sub>20%</sub>-350.

## V. Additional TGA curves and stress-strain curves of PI films.

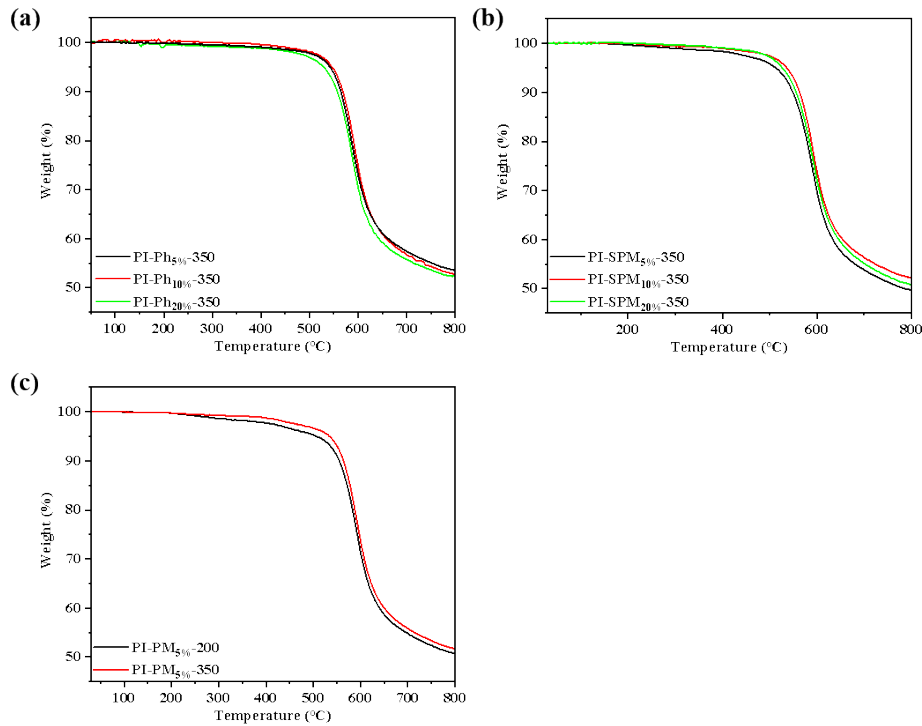

**Fig. S15** TGA curves of (a) (PhNH<sub>2</sub>/ODA)/PMDA co-PI films cured at 350°C, (b)

(SPMNH<sub>2</sub>/ODA)/PMDA co-PI films cured at 350°C and (c) PI-PM<sub>5%</sub>-200 and PI-PM<sub>5%</sub>-350.

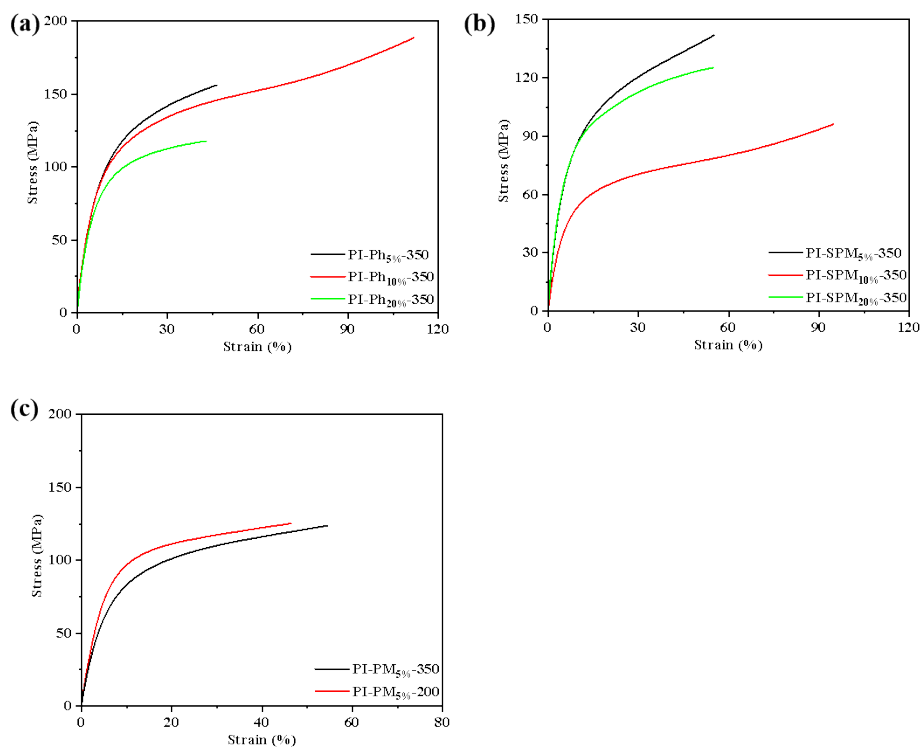

**Fig. S16** Typical stress–strain curves of (a) (PhNH<sub>2</sub>/ODA)/PMDA co-PI films cured at 350°C, (b) (SPMNH<sub>2</sub>/ODA)/PMDA co-PI films cured at 350°C, (c) PI-PM<sub>5%</sub>-350 and PI-PM<sub>5%</sub>-200.

## VI. Additional detailed data of PI films.

**Table S1** Molecular weight of the resulting PAA solutions

| Sample Name            | <i>M<sub>n</sub></i> (Da) | <i>M<sub>w</sub></i> (Da) | Polydispersity |
|------------------------|---------------------------|---------------------------|----------------|
| PAA-0                  | 70673                     | 98942                     | 1.40           |
| PAA-Ph <sub>5%</sub>   | 70248                     | 98347                     | 1.40           |
| PAA-Ph <sub>10%</sub>  | 69843                     | 99177                     | 1.42           |
| PAA-Ph <sub>20%</sub>  | 61082                     | 86736                     | 1.42           |
| PAA-SPM <sub>5%</sub>  | 70449                     | 100742                    | 1.43           |
| PAA-SPM <sub>10%</sub> | 68751                     | 97626                     | 1.42           |
| PAA-SPM <sub>20%</sub> | 60993                     | 86610                     | 1.42           |
| PAA-PM <sub>5%</sub>   | 70232                     | 94813                     | 1.35           |
| PAA-PM <sub>10%</sub>  | 62998                     | 85047                     | 1.35           |
| PAA-PM <sub>20%</sub>  | 60674                     | 80090                     | 1.32           |

**Table S2** Detailed data of *d*-spacing, CTE and dichroic ratio of the resulting PI films

| Sample Name                | ID <sub>1380</sub> (%) | <i>d</i> -Spacing (Å) | CTE (ppm/K) | Dichroic ratio | Diamine Ratio(n)                |
|----------------------------|------------------------|-----------------------|-------------|----------------|---------------------------------|
| PI-350                     | -                      | 4.88                  | 34          | 2.12           | ODA                             |
| PI-Ph <sub>5%</sub> -350   | -                      | 4.89                  | 34          | 2.22           | ODA:PhNH <sub>2</sub> =0.5:9.5  |
| PI-Ph <sub>10%</sub> -350  | -                      | 4.84                  | 36          | 2.10           | ODA:PhNH <sub>2</sub> =1.0:9.0  |
| PI-Ph <sub>20%</sub> -350  | -                      | 4.79                  | 42          | 2.11           | ODA:PhNH <sub>2</sub> =2.0:8.0  |
| PI-SPM <sub>5%</sub> -350  | -                      | 4.87                  | 30          | 2.11           | ODA:SPMNH <sub>2</sub> =0.5:9.5 |
| PI-SPM <sub>10%</sub> -350 | -                      | 4.88                  | 34          | 2.26           | ODA:SPMNH <sub>2</sub> =1.0:9.0 |
| PI-SPM <sub>20%</sub> -350 | -                      | 4.84                  | 37          | 2.09           | ODA:SPMNH <sub>2</sub> =2.0:8.0 |
| PI-PM <sub>5%</sub> -350   | -                      | 4.85                  | 42          | 2.14           | ODA:PMNH <sub>2</sub> =0.5:9.5  |
| PI-PM <sub>10%</sub> -350  | -                      | 4.79                  | 35          | 2.21           | ODA:PMNH <sub>2</sub> =1.0:9.0  |
| PI-PM <sub>20%</sub> -350  | -                      | 4.65                  | 37          | 2.16           | ODA:PMNH <sub>2</sub> =2.0:8.0  |
| PI-PM <sub>5%</sub> -200   | 94.1                   | 4.81                  | 37          | 2.14           | ODA:PMNH <sub>2</sub> =0.5:9.5  |
| PI-PM <sub>10%</sub> -200  | 92.5                   | 5.06                  | 28          | 2.21           | ODA:PMNH <sub>2</sub> =1.0:9.0  |
| PI-PM <sub>20%</sub> -200  | 92.8                   | 4.85                  | 28          | 2.24           | ODA:PMNH <sub>2</sub> =2.0:8.0  |

**Table S3** Mechanical and thermal properties of the resulting PI films

| Sample Name                | <i>T</i> <sub>d5%</sub> (°C) | <i>T</i> <sub>d10%</sub> (°C) | <i>T</i> <sub>g</sub> (°C) | <i>E</i> (GPa) | $\sigma_{\max}$ (MPa) | $\epsilon_b$ (%) |
|----------------------------|------------------------------|-------------------------------|----------------------------|----------------|-----------------------|------------------|
| PI-350                     | 547                          | 561                           | 416                        | 2.56           | 184                   | 67.2             |
| PI-Ph <sub>5%</sub> -350   | 546                          | 569                           | 361                        | 2.58           | 156                   | 46.5             |
| PI-Ph <sub>10%</sub> -350  | 529                          | 557                           | 360                        | 2.78           | 189                   | 112.0            |
| PI-Ph <sub>20%</sub> -350  | 542                          | 564                           | 351                        | 2.37           | 118                   | 42.9             |
| PI-SPM <sub>5%</sub> -350  | 513                          | 549                           | 370                        | 2.45           | 142                   | 55.1             |
| PI-SPM <sub>10%</sub> -350 | 536                          | 563                           | 361                        | 1.47           | 96                    | 94.8             |
| PI-SPM <sub>20%</sub> -350 | 527                          | 556                           | 345                        | 2.76           | 125                   | 54.9             |
| PI-PM <sub>5%</sub> -350   | 534                          | 564                           | 362                        | 2.34           | 124                   | 54.4             |
| PI-PM <sub>10%</sub> -350  | 502                          | 541                           | 393                        | 2.73           | 154                   | 68.2             |
| PI-PM <sub>20%</sub> -350  | 467                          | 528                           | 385                        | 2.88           | 137                   | 31.1             |
| PI-PM <sub>5%</sub> -200   | 507                          | 555                           | 346                        | 2.70           | 125                   | 46.4             |
| PI-PM <sub>10%</sub> -200  | 455                          | 532                           | 373                        | 2.83           | 130                   | 50.6             |
| PI-PM <sub>20%</sub> -200  | 447                          | 511                           | 352                        | 3.06           | 120                   | 61.6             |

**Table S4** Contact angle and optical properties of the resulting PI films

| Sample Name                | Dielectric constant (10 GHz) | Dielectric loss factors (10 <sup>-2</sup> ) (10 GHz) | Contact Angle (°) |
|----------------------------|------------------------------|------------------------------------------------------|-------------------|
| PI-350                     | 3.36                         | 1.52                                                 | 67.8              |
| PI-Ph <sub>5%</sub> -350   | 3.49                         | 1.94                                                 | 73.3              |
| PI-Ph <sub>10%</sub> -350  | 3.42                         | 1.60                                                 | 73.3              |
| PI-Ph <sub>20%</sub> -350  | 3.49                         | 1.74                                                 | 78.1              |
| PI-SPM <sub>5%</sub> -350  | 3.30                         | 3.38                                                 | 73.2              |
| PI-SPM <sub>10%</sub> -350 | 3.46                         | 2.39                                                 | 72.1              |
| PI-SPM <sub>20%</sub> -350 | 3.33                         | 2.18                                                 | 76.6              |
| PI-PM <sub>5%</sub> -350   | 3.54                         | 2.35                                                 | 72.3              |
| PI-PM <sub>10%</sub> -350  | 3.41                         | 3.31                                                 | 75.9              |
| PI-PM <sub>20%</sub> -350  | 3.51                         | 2.90                                                 | 79.6              |
| PI-PM <sub>5%</sub> -200   | 3.63                         | 2.82                                                 | 69.7              |
| PI-PM <sub>10%</sub> -200  | 3.68                         | 4.07                                                 | 62.4              |
| PI-PM <sub>20%</sub> -200  | 3.49                         | 3.16                                                 | 69.5              |

## References

- 1 X. Lv, S. Qiu, S. Huang, K. Wang and J. Li, *Polymer*, 2022, **261**, 125418.
